# Supplementary material
Source: PubMed Central journal article supplement (PMC11470355)
Supplement: ajtr0016-5114-f5.pdf [file ajtr0016-5114-f5.pdf]

## Interaction of Ginkgo tablets and metoprolol

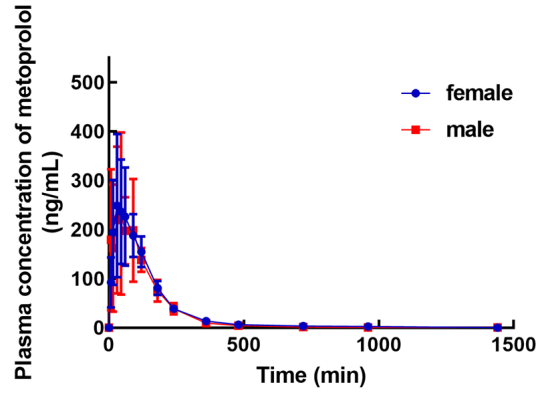

**Figure S1.** Plasma concentration of metoprolol in male and female rats.

**Table S1.** Pharmacokinetic measurements of metoprolol in male and female rats

| Parameters         | Units       | Male            | Female          |
|--------------------|-------------|-----------------|-----------------|
| AUC <sub>0-t</sub> | µg/mL × min | 37.33 ± 4.82    | 40.58 ± 7.49    |
| t <sub>1/2</sub>   | min         | 242.19 ± 140.81 | 277.45 ± 103.76 |
| T <sub>max</sub>   | min         | 75.00 ± 39.69   | 41.25 ± 33.26   |
| C <sub>max</sub>   | ng/mL       | 250.66 ± 145.18 | 295.62 ± 112.62 |
| MRT <sub>0-t</sub> | min         | 154.80 ± 19.30  | 169.47 ± 54.88  |
| Cl                 | L/min/kg    | 0.586 ± 0.031   | 0.504 ± 0.096   |
| Vd                 | L/kg        | 0.178 ± 0.032   | 0.195 ± 0.062   |

AUC<sub>0-t</sub>: area under the curve; t<sub>1/2</sub>: half-life; T<sub>max</sub>: time reached the maximum concentration; C<sub>max</sub>: maximum concentration; MRT<sub>0-t</sub>: mean residence time; Cl: clearance rate; Vd: apparent volume of distribution at steady state.
